# Supplementary material for: Stress diminishes outcome but enhances response representations during instrumental learning
Source: eLife journal article supplement (doi:10.7554/elife.67517), 2022-07-18
Supplement: supp [file elife_poa_e67517_Figure_2_figure_supplement_1.docx]

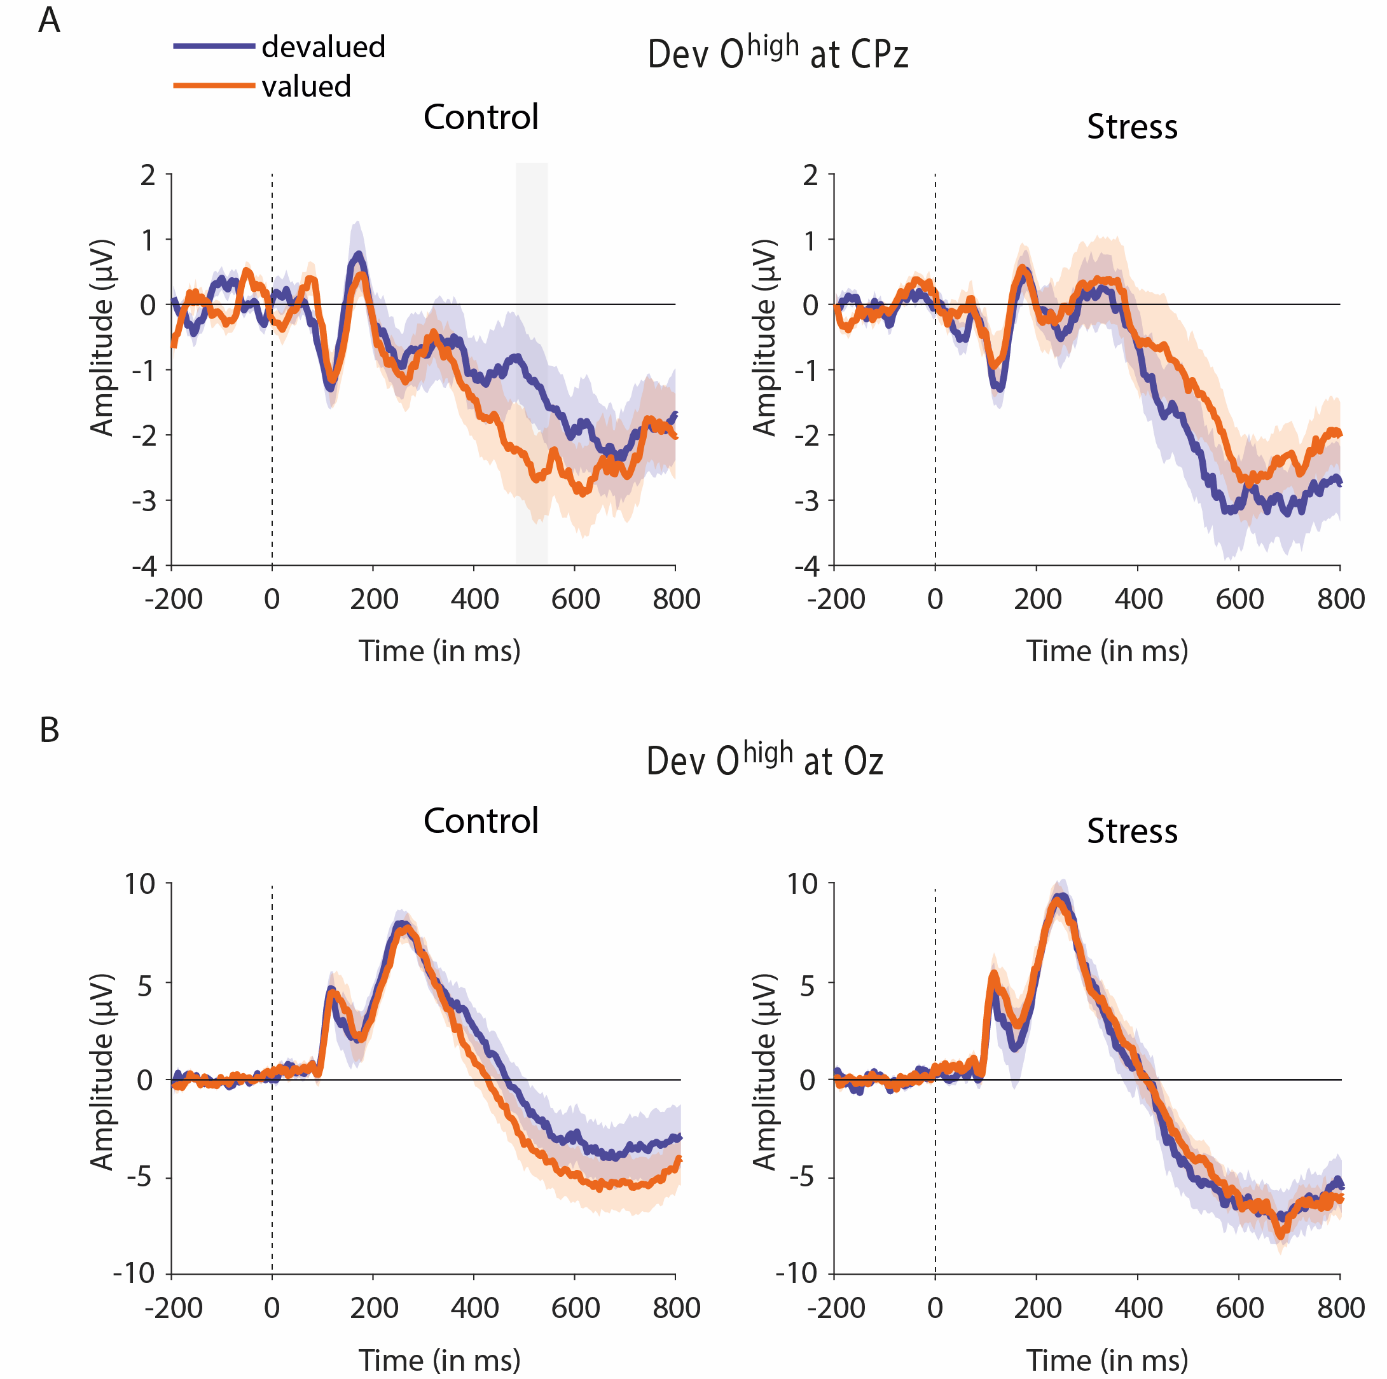


**Figure 2 – figure supplement 1.** Event-related potentials during Dev Ohigh blocks. **A** Mean centroparietal activity for devalued and valued stimuli during Dev Ohigh for control and stressed participants (baseline-corrected). The late component tended to be sensitive to the outcome devaluation in the control group but not in the stress group. The light-colored background bar refers to the time range showing marginally significant group differences. **B** Mean occipital activity for devalued and valued stimuli during Dev Ohigh for control and stressed participants (baseline-corrected). The stimulus-locked P1 component was insensitive to outcome devaluation in both groups. Data represent means ± SEM.
