# Supplementary material for: Stress diminishes outcome but enhances response representations during instrumental learning
Source: eLife journal article supplement (doi:10.7554/elife.67517), 2022-07-18
Supplement: supp [file elife_poa_e67517_Figure_2_figure_supplement_3.docx]

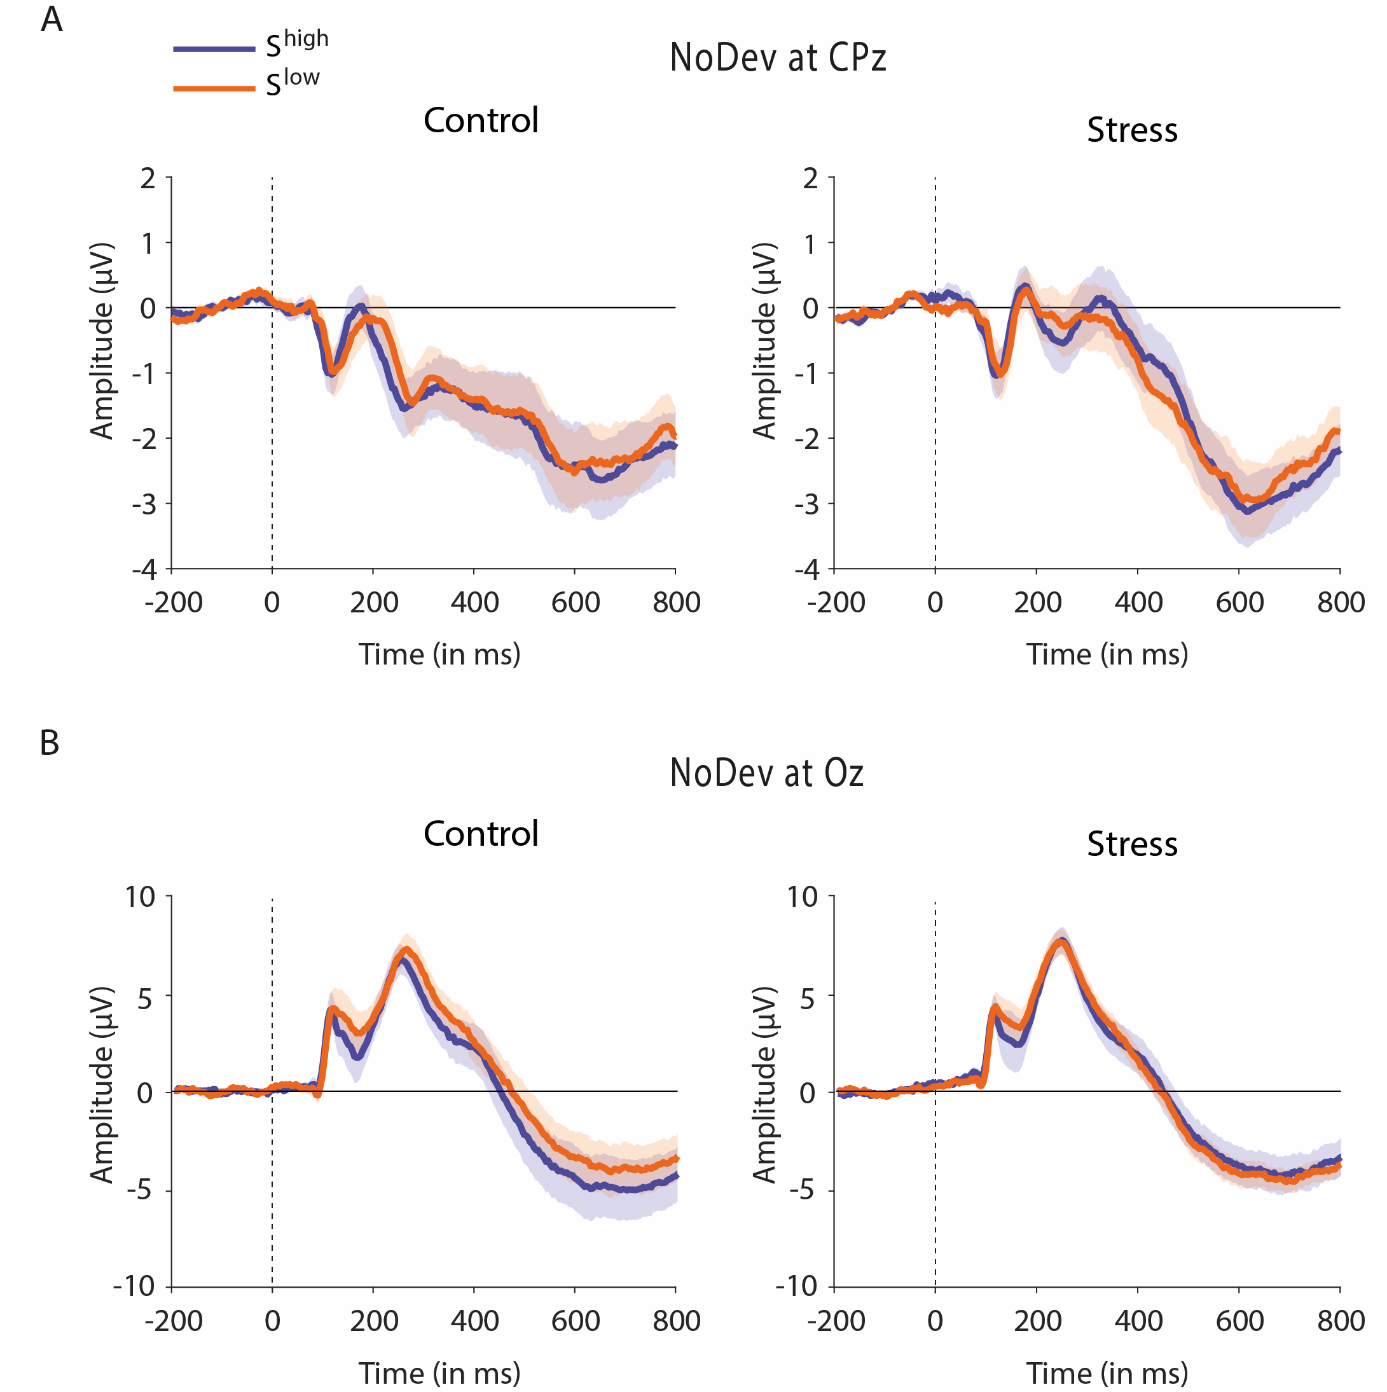


**Figure 2 – figure supplement 3.** Event-related potentials during NoDev blocks. **A** Mean centroparietal activity for Shigh and Slow during NoDev for control and stressed participants (baseline-corrected). **B** Mean occipital activity for Shigh and Slow during NoDev for control and stressed participants (baseline-corrected). Data represent means ± SEM.
