# Supplementary material for: Stress diminishes outcome but enhances response representations during instrumental learning
Source: eLife journal article supplement (doi:10.7554/elife.67517), 2022-07-18
Supplement: supp [file elife_poa_e67517_Figure_2_figure_supplement_4.docx]

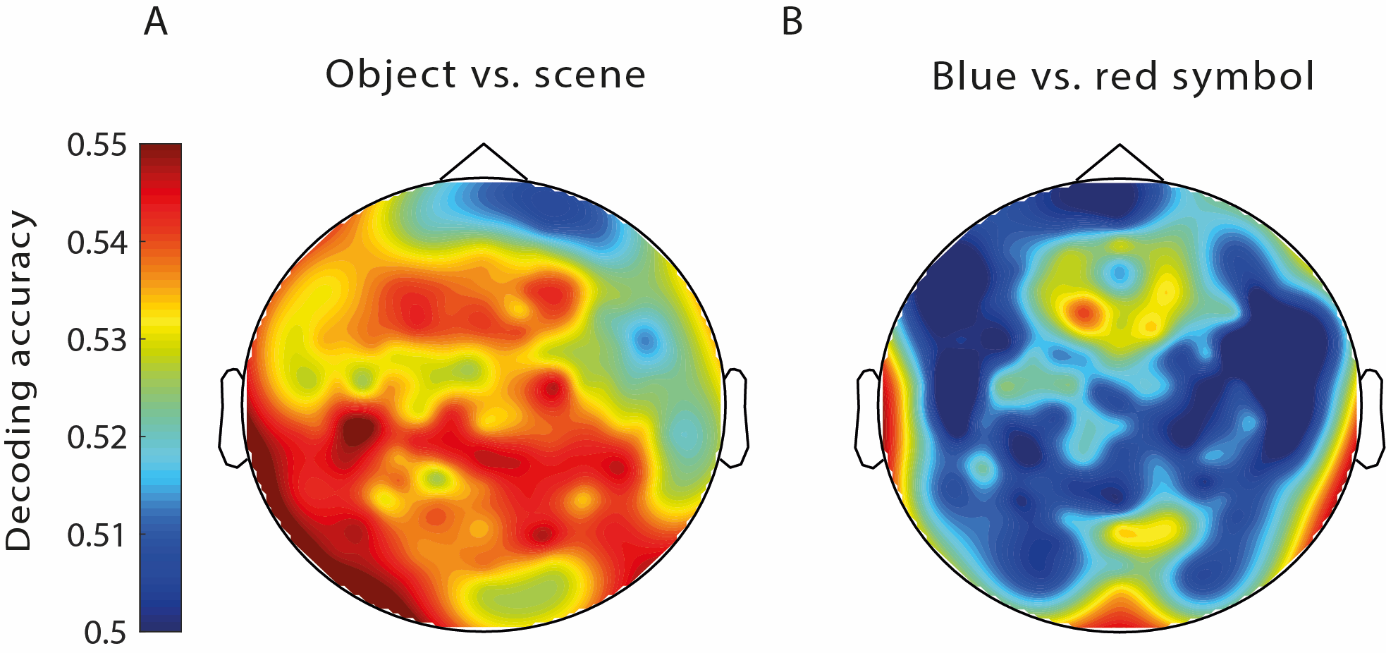


**Figure 2 – figure supplement 4.** Searchlight analysis of differences in object vs. scene (**A**) and blue vs. red symbol (**B**) processing during the DMS task (chance performance was 52.85% and 53.90%, respectively, calculated using Wald intervals (***Agresti and Caffo, 2000***).
