# Supplementary material for: Stress diminishes outcome but enhances response representations during instrumental learning
Source: eLife journal article supplement (doi:10.7554/elife.67517), 2022-07-18
Supplement: supp [file elife_poa_e67517_Figure_3_figure_supplement_1.docx]

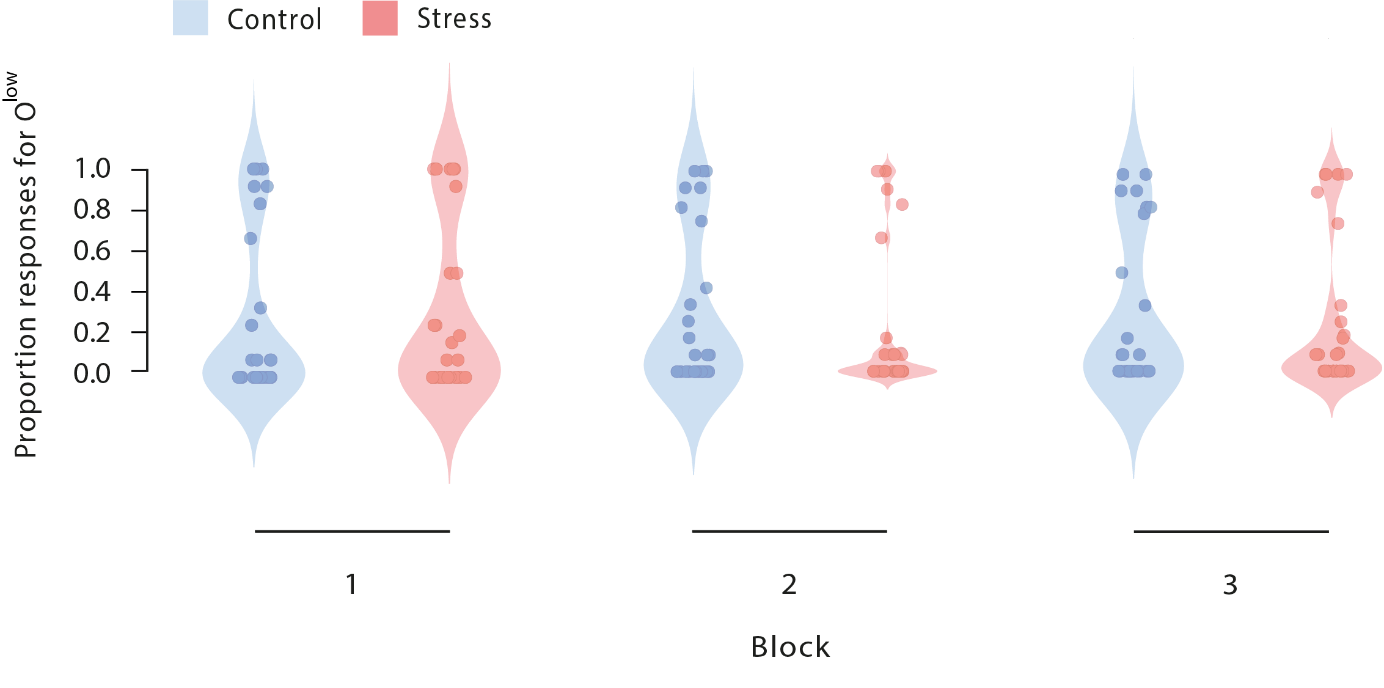


**Figure 3 – figure supplement 1.** Proportion of responses for devalued outcome across the reinforcement learning task during Dev Olow blocks.
