# Supplementary material for: Stress diminishes outcome but enhances response representations during instrumental learning
Source: eLife journal article supplement (doi:10.7554/elife.67517), 2022-07-18
Supplement: supp [file elife_poa_e67517_Figure_3_figure_supplement_2.docx]

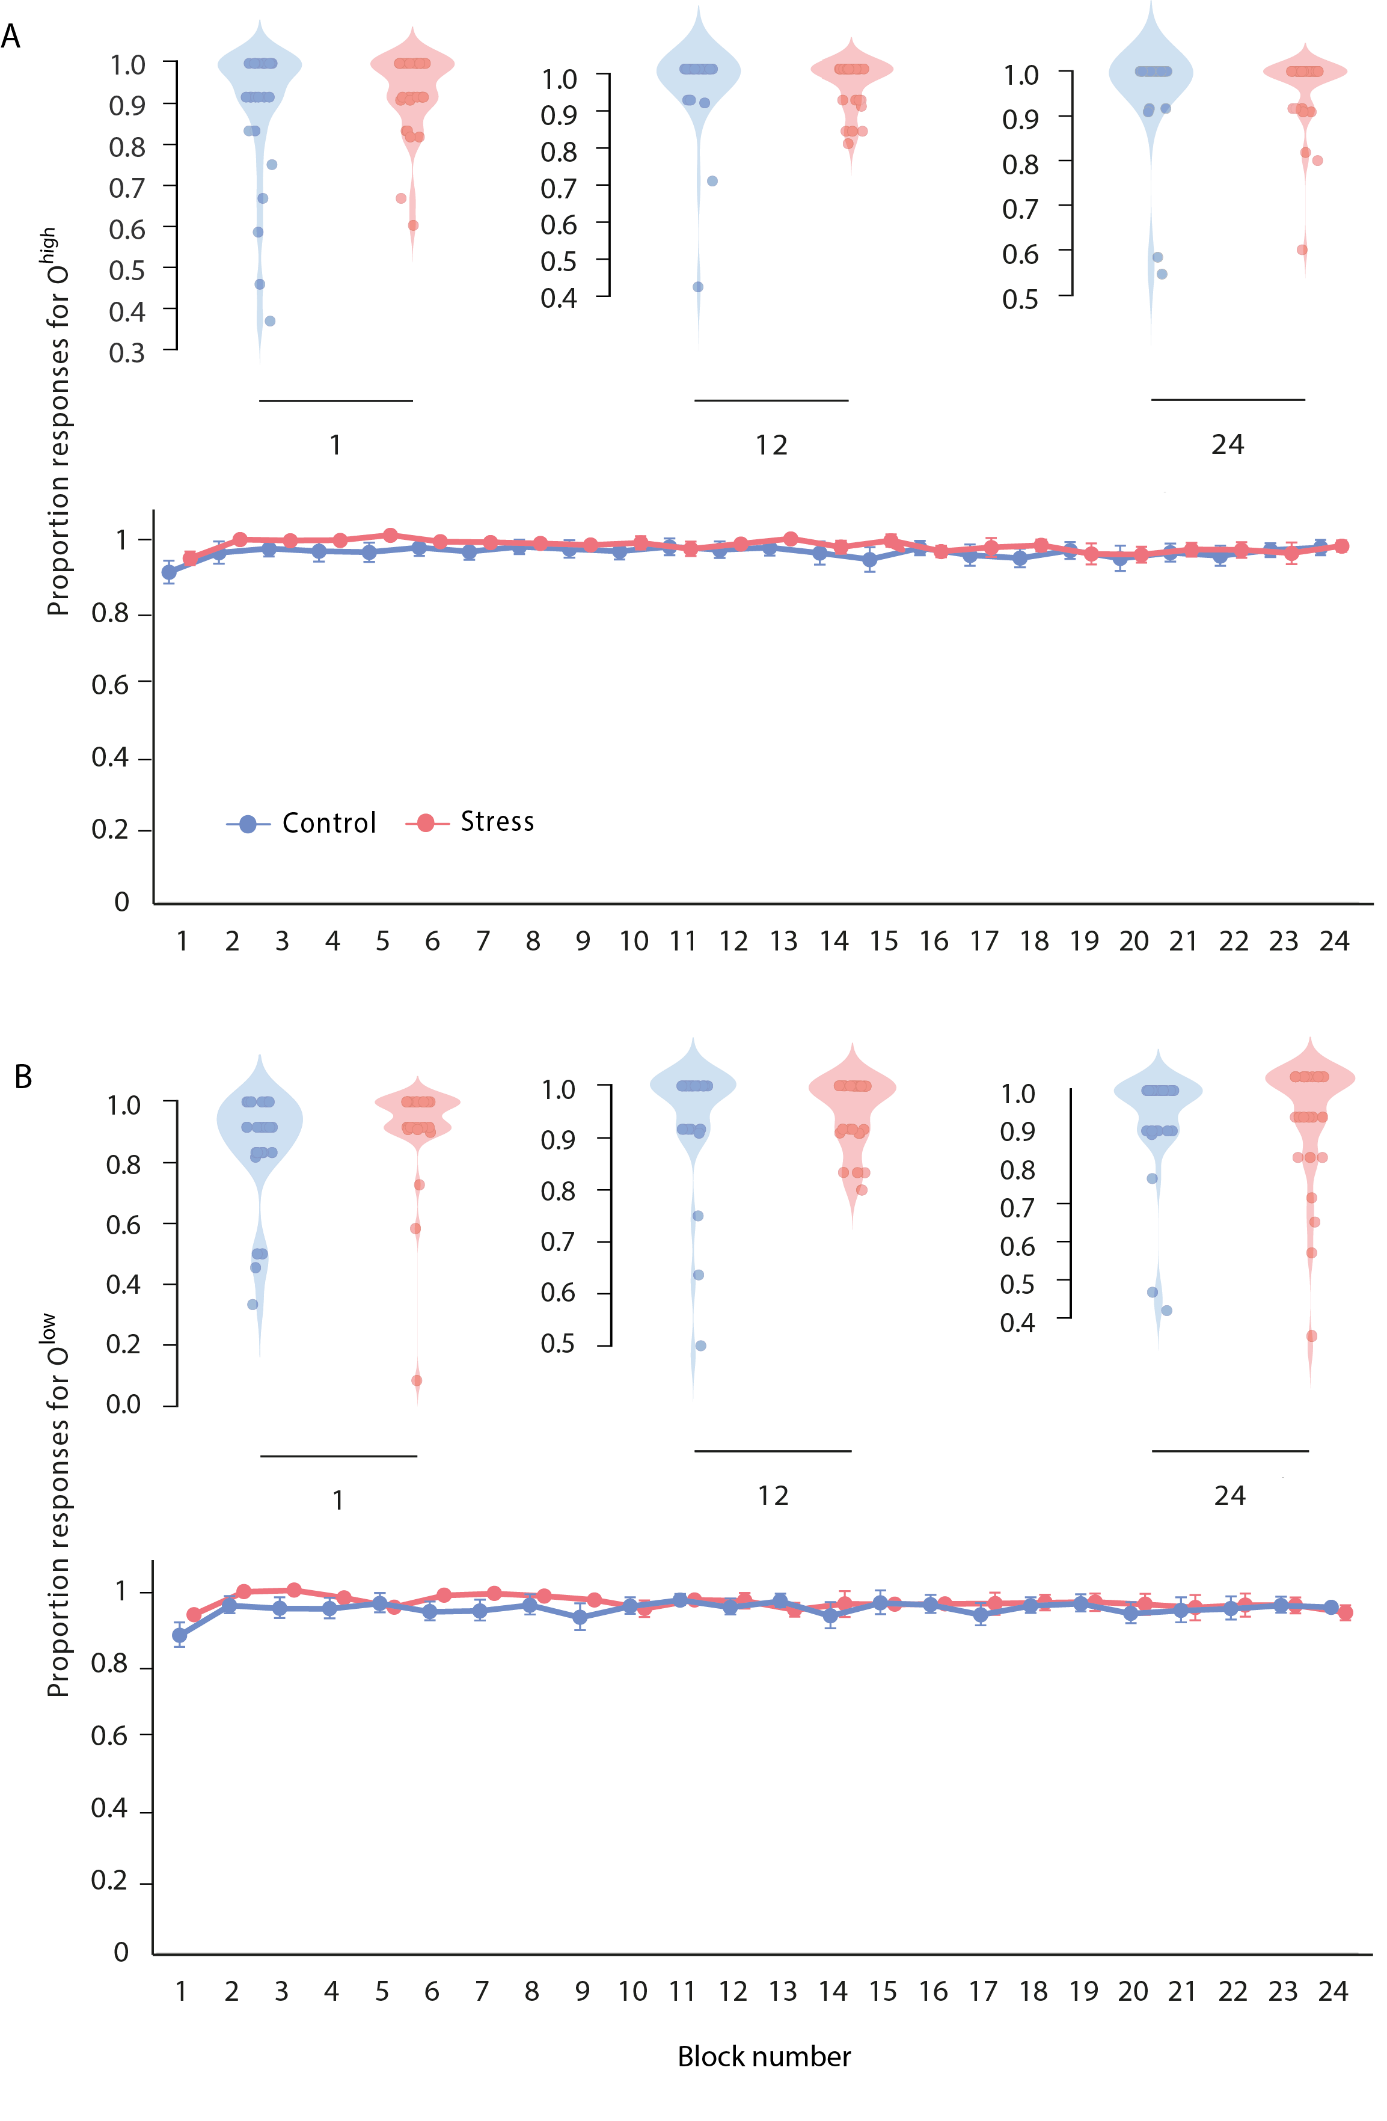


**Figure 3 – figure supplement 2.** Proportion of correct responses during NoDev blocks after low, moderate, and high training intensity. **A** Violin plots illustrate the proportion of correct responses in Ohigh trials during NoDev blocks after low (Block1), moderate (Block 12), and high (Block 24) training intensity (upper part). The line graph illustrates the proportion ­of correct responses in Ohigh trials during NoDev from block 1 to block 24. **B** Violin plots illustrate the proportion of correct responses in Olow trials during NoDev blocks after low (Block1), moderate (Block 12), and high (Block 24) training intensity. The line graph illustrates the proportion ­of correct responses in Olow trials during NoDev from block 1 to block 24. In both violin, dots represent mean performance of individual participants. In both line graphs, error bars represent the standard error of the mean.
